# Supplementary material for: T-Cell Assay after COVID-19 Vaccination Could Be a Useful Tool? A Pilot Study on Interferon-Gamma Release Assay in Healthcare Workers
Source: MDPI journal article supplement (doi:10.3390/diseases10030049), 2022-07-31
Supplement: s1 [file s1]

## Supplemental material

| Antibody monitoring | N° (Total 98) | N° of dropouts | N° of positive subjects at SARS-CoV-2 molecular swab during the period monitoring | N° of subjects in therapeutic care | N° of vaccinated subjects                                                             | T0:<br>First dose                  | T1:<br>Second dose                      | T2:<br>15 days after 2 <sup>nd</sup> dose | T3:<br>45 days after 2 <sup>nd</sup> dose  | T4:<br>3 months after 2 <sup>nd</sup> dose | T5:<br>6 months after 2 <sup>nd</sup> dose | T6:<br>8 months after 2 <sup>nd</sup> dose |
|---------------------|---------------|----------------|-----------------------------------------------------------------------------------|------------------------------------|---------------------------------------------------------------------------------------|------------------------------------|-----------------------------------------|-------------------------------------------|--------------------------------------------|--------------------------------------------|--------------------------------------------|--------------------------------------------|
|                     |               |                |                                                                                   |                                    |                                                                                       | RBD median levels (BAU/mL)         | RBD median levels (BAU/mL)              | RBD median levels (BAU/mL)                | RBD median levels (BAU/mL)                 | RBD median levels (BAU/mL)                 | RBD median levels (BAU/mL)                 | RBD median levels (BAU/mL)                 |
| Group 1             | 8             | n/a            | n/a                                                                               | n/a                                | 8                                                                                     | 0.00<br>[IQR: 0.00 – 0.184]        | 63.56<br>[IQR: 60.52 – 70.70]           | 480.50<br>[IQR: 63.75 – 795.5]            | 454.50<br>[IQR: 305.00 – 530.25]           | 260.00<br>[IQR: 183.1 – 364.15]            | 52.23<br>[IQR: 43.84 – 66.00]              | 28.898<br>[IQR: 27.445 – 33.969]           |
| Group 2             | 9             | n/a            | n/a                                                                               | n/a                                | 9                                                                                     | 0.21<br>[IQR: 0.00 – 0.71]         | 141.25<br>[IQR: 24.40 – 298.23]         | 611.59<br>[IQR: 105.65 – 1291.33]         | 2648.18<br>[IQR: 457.46 – 5591.46]         | 1716.40<br>[IQR: 87.90 – 3392.50]          | 1485<br>[IQR: 1066.8 – 4330.00]            | 645.295<br>[IQR: 376.343 – 1072.254]       |
| Group 3             | 6             | n/a            | n/a                                                                               | n/a                                | 0                                                                                     | 0.62<br>[IQR: 0.50 – 1.19]         | 0.12<br>[IQR: 0.10 – 0.71]              | 0.65<br>[IQR: 0.61 – 0.85]                | 1.17<br>[IQR: 0.69 – 3.20]                 | 0.29<br>[IQR: 0.03 – 0.67]                 | 1.41<br>[IQR: 0.75- 2.00]                  | 0.563<br>[IQR: 0.00 – 2.736]               |
| Subjects excluded   | 75            | 8              | 10                                                                                | 1                                  | 56 subjects:<br>54 with fully complete dose + 2 subjects with one single dose booster | N=54<br>0.00<br>[IQR: 0.00 – 0.35] | N=54<br>171.92<br>[IQR: 63.86 – 363.12] | N=54<br>433.00<br>[IQR: 433.00 – 3363.11] | N=54<br>1346.63<br>[IQR: 311.63 – 2196.17] | N=54<br>430.00<br>[IQR: 321.00 – 746.40]   | N=54<br>227.35<br>[IQR: 157.60 – 318.90]   | N=54<br>125<br>[IQR: 62.52 – 299.99]       |

**Table S1:** Number of subjects and median value and interquartile range (IQR: 25<sup>th</sup> and 75<sup>th</sup> percentile) at all the times of samples collection of the period of monitoring [RBD: Receptor Binding Domain; BAU/mL: Binding Antibody Unit/ml; IQR: interquartile range; n/a: no applicable; T: time; N: number].
